# Supplementary material for: Identification and characterization of AckA-dependent protein acetylation in Neisseria gonorrhoeae
Source: PLoS One. 2017 Jun 27;12(6):e0179621. doi: 10.1371/journal.pone.0179621 (PMC5487020; doi:10.1371/journal.pone.0179621)
Supplement: S4 Table — (XLSX) [file pone.0179621.s004.xlsx]

## Sheet: MasterList_proteins
S4 Table. Acetylated proteins and number of acetylated sites detected in each protein overall.
			Protein detected in any replicate
Accession #	Protein Names	# Ac Sites detected	WT	AckA
NGO1429	putative heat shock protein (chaperone) (DnaK) 1390554:1392479 forward MW:68863	33	yes	yes
NGO2095	chaperonin 60 Kd subunit (GroEL) 2072890:2074521 forward MW:57351	30	yes	yes
NGO0604	putative 30S ribosomal protein S1 589321:591003 reverse MW:61191	23	yes	yes
NGO1046	putative ClpB protein 1006128:1008704 forward MW:95098	21	yes	yes
NGO0926	putative peroxiredoxin family protein/glutaredoxin 906077:906811 reverse MW:26879	18	yes	yes
NGO0562	putative dihydrolipoamide dehydrogenase 542108:543889 reverse MW:61794	18	yes	yes
NGO0565	putative pyruvate dehydrogenase E1 component (Odp1) 546184:548844 reverse MW:99594	17	yes	yes
NGO1843	putative translation elongation factor G (FusA) 1808965:1811067 reverse MW:77173	17	yes	yes
NGO1974	putative elongation factor TS (Tsf) 1951427:1952278 reverse MW:30359	17	yes	yes
NGO0592	putative trigger factor 578769:580079 forward MW:48368	17	yes	yes
NGO2024	putative 50S ribosomal protein L13 (RplM) 1995174:1995602 forward MW:16238	16	yes	yes
NGO0617	putative enolase (2-phosphoglycerate dehydratase) 604935:606218 reverse MW:46112	16	yes	yes
NGO1854	putative 50S ribosomal protein L1 (RplA) 1824969:1825661 reverse MW:24121	16	yes	yes
NGO0186	putative zinc-binding alcohol dehydrogenas 186330:187391 reverse MW:37933	16	yes	yes
NGO1975	putative 30S ribosomal protein S2 (RpsB) 1952410:1953135 reverse MW:26917	15	yes	yes
NGO1824	putative 30S ribosomal protein S5 (RpsE) 1798345:1798860 reverse MW:18246	15	yes	yes
NGO1919	putative phosphoglycerate kinase (Pgk) 1897572:1898762 forward MW:41181	15	yes	yes
NGO1858; NGO1842	putative translation elongation factor Tu (TufA2) 1827212:1828393 reverse MW:42938; translation elongation factor TU (TufA1) 1807693:1808874 reverse MW:42938	14	yes	yes
NGO0335	putative polyribonucleotide nucleotidyltransferase (Pnp) 329799:331919 forward MW:76455	14	yes	yes
NGO0913	putative succinyl-CoA synthetase beta subunit 891533:892696 reverse MW:41308	14	yes	yes
NGO1796	putative ribosome recycling factor (Rrf) 1768792:1769346 forward MW:20643	14	yes	yes
NGO1844	putative 30S ribosomal protein S7 (RpsG) 1811089:1811556 reverse MW:17644	13	yes	yes
NGO1828	putative 50S ribosomal protein L24 (RplX) 1801061:1801381 reverse MW:11608	13	yes	yes
NGO1231	putative aconitate hydratase 2 (Aco2) 1180389:1182971 forward MW:92732	13	yes	yes
NGO1827	putative 50S ribosomal protein L5 (RplE) 1800512:1801048 reverse MW:20379	12	yes	yes
NGO1852	putative 50S ribosomal protein L7/L12 (RplL) 1823812:1824180 reverse MW:12564	12	yes	yes
NGO1832	putative 30S ribosomal subunit protein S3 (RpsC) 1802840:1803529 reverse MW:25826	12	yes	yes
NGO1258	putative phosphoglycerate mutase (PgmA) 1209697:1210377 reverse MW:25928	12	yes	yes
NGO0564	putative dihydrolipoamide acetyltransferase component of pyruvate dehydrogenase complex (Odp2) 544445:546031 reverse MW:54693	12	yes	yes
NGO1935	putative electron transfer flavoprotein beta-subunit (EtfB) 1912415:1913161 forward MW:26987	12	yes	yes
NGO2133	conserved hypothetical protein 2113368:2113907 reverse MW:19653	12	yes	yes
NGO0916	putative dihydrolipoamide succinyltransferase E2 component (Odo2) 894872:896050 reverse MW:41685	12	yes	yes
NGO1825	putative 50S ribosomal protein L6 (RplF) 1799249:1799779 reverse MW:18940	11	yes	yes
NGO2150	putative ATP synthase beta chain (AtpD) 2126521:2127915 forward MW:50424	11	yes	yes
NGO1830	putative 30S ribosomal protein S17 (RpsQ) 1801986:1802246 reverse MW:9820	11	yes	yes
NGO0296	putative translation initiation factor IF-3 298881:299399 forward MW:19761	11	yes	yes
NGO1855	putative 50S ribosomal protein L11 (RplK) 1825664:1826095 reverse MW:14957	11	yes	yes
NGO0375	phosphoglucomutase, (Pgm) 368712:370091 reverse MW:49436	11	yes	yes
NGO0915	putative dihydrolipoamide dehydrogenase E3 component (DldH) 893178:894608 reverse MW:50079	11	yes	yes
NGO1901	putative heat shock protein/chaperone DnaJ (DnaJ) 1870120:1871238 reverse MW:40602	11	yes	yes
NGO1834	putative 30S ribosomal protein S19 (RpsS) 1803880:1804155 reverse MW:10390	11	yes	yes
NGO1851	putative DNA-directed RNA polymerase beta chain (RpoB) 1819443:1823618 reverse MW:155750	11	yes	yes
NGO1318	conserved hypothetical protein 1275624:1276313 reverse MW:25858	11	yes	yes
NGO1770	putative oligopeptidase A (PrlC) 1735324:1737357 reverse MW:75905	11	yes	yes
NGO2148	putative ATP synthase alpha chain (AtpA) 2124036:2125580 forward MW:55241	10	yes	yes
NGO0376	putative peptidyl-prolyl cis-trans isomerase B 370262:370768 reverse MW:18880	10	yes	yes
NGO0200	putative phosphoenol pyruvate synthase (PpsA) 201755:204136 reverse MW:87237	10	yes	yes
NGO1982	conserved hypothetical protein 1957503:1957799 reverse MW:11436	10	yes	yes
NGO1358	putative glutamate dehydrogenase 1318346:1319677 forward MW:48473	10	yes	yes
NGO2130	putative regulator of pilE expression (RegF) 2112097:2112699 forward MW:23165	10	yes	yes
NGO1489	putative aspartyl-tRNA synthetase 1452896:1454443 reverse MW:58218	10	yes	yes
NGO0636	putative NifS-like aminotranfserase 623952:625163 reverse MW:44578	10	yes	yes
NGO0779	putative homoserine dehydrogenase 773079:774383 reverse MW:46560	10	yes	yes
NGO0821	putative acetyl-CoA carboxylase carboxyl transferase subunit A (AccA) 811916:812872 reverse MW:35420	10	yes	yes
NGO1239	conserved hypothetical protein 1190466:1191350 forward MW:33016	10	yes	yes
NGO0034	putative fructose-bisphosphate aldolase (Alf) 29995:31056 reverse MW:38313	10	yes	yes
NGO1850	putative DNA-directed RNA polymerase beta' chain (RpoC) 1815115:1819287 reverse MW:153796	10	yes	yes
NGO1829	putative 50S ribosomal protein L14 (RplN) 1801396:1801761 reverse MW:13403	9	yes	yes
NGO2094	putative chaperonin 10 Kd subunit (GroES) 2072508:2072795 forward MW:10287	9	yes	yes
NGO1838	putative 50S ribosomal protein L3 (RplC) 1805934:1806575 reverse MW:22678	9	yes	yes
NGO0400	adenylate kinase (Adk) 392503:393147 forward MW:23124	9	yes	yes
NGO0214	putative phosphotransacetylase 216385:217884 reverse MW:52098	9	yes	yes
NGO1254	putative alanyl-tRNA synthetase (AlaS) 1204637:1207258 forward MW:95928	9	yes	yes
NGO2053	UDP-N-acetylglucosamine pyrophosphorylase (GlmU) 2028119:2029486 reverse MW:48873	9	yes	yes
NGO0677	putative 3-isopropylmalate dehydratase small subunit 666276:666914 reverse MW:24208	9	yes	yes
NGO1452	putative aspartate aminotransferase 1417471:1418658 forward MW:44065	9	yes	yes
NGO0405	putative DNA damage inducible protein (DinD) 398235:399083 forward MW:32263	9	yes	yes
NGO0764	putative ABC-transporter, ATP-binding protein 758303:759928 reverse MW:60807	9	yes	yes
NGO1990	putative GTP-binding protein 1962758:1963909 forward MW:41998	9	yes	yes
NGO0863	conserved hypothetical protein 845774:845989 reverse MW:8222	9	yes	yes
NGO1286	putative translation initiation factor IF-2 (InfB) 1238492:1241320 forward MW:101019	9	yes	yes
NGO0921	putative succinate dehydrogenase flavoprotein subunit 901660:903420 reverse MW:64449	9	yes	yes
NGO1809	putative valyl-tRNA synthetase (ValS) 1783137:1785971 forward MW:106334	9	yes	yes
NGO0581	putative 30S ribosomal protein S6 569360:569725 forward MW:13861	8	yes	yes
NGO0442	conserved hypothetical protein 436534:437103 forward MW:20954	8	yes	yes
NGO1826	putative 30S ribosomal protein S8 (RpsH) 1799796:1800185 reverse MW:14123	8	yes	yes
NGO1931	putative glyceraldehyde 3-phosphate dehydrogenase C (GapC) 1908253:1909254 forward MW:35761	8	yes	yes
NGO1815	putative septum site-determining protein (MinD), fragment 1791461:1792273 reverse MW:29595	8	yes	yes
NGO0098	putative pilus assembly protein(PilM) 107404:108516 reverse MW:41311	8	yes	yes
NGO0713	putative khg/kdpg 4-hydroxy-2-oxoglutarate aldolase/2-deydro-3-deoxyphosphogluconate bifunctional aldolase (AlkH) 712011:712646 reverse MW:22004	8	yes	yes
NGO1819	putative 30S ribosomal protein S4 (RpsD) 1794569:1795186 reverse MW:23250	8	yes	yes
NGO0240	putative malic enzyme, malate dehydrogenase/oxaloacetate-decarboxylating 243240:244517 forward MW:45995	8	yes	yes
NGO0062	putative formate--tetrahydrofolate ligase (Fths) 61831:63504 forward MW:59140	8	yes	yes
NGO0580	putative thioredoxin reductase 568254:569201 forward MW:33654	8	yes	yes
NGO0328	conserved hypothetical protein 325073:325573 forward MW:18734	8	yes	yes
NGO1679	putative 50S ribosomal protein L33 (RpmG) 1633439:1633591 reverse MW:5907	8	yes	yes
NGO2168	putative 3-oxoacyl-[acyl-carrier-protein] synthase III (FabH) 2144854:2145813 reverse MW:34002	8	yes	yes
NGO0917	putative 2-oxoglutarate dehydrogenase, E1 component (Odo1) 896153:898978 reverse MW:105119	8	yes	yes
NGO0715	putative glucose 6-phosphate 1-dehydrogenase 715211:716653 forward MW:53889	8	yes	yes
NGO2164	putative GMP synthetase (GuaA) 2139812:2141374 reverse MW:57626	8	yes	yes
NGO0100	putative GTPase 111187:111819 reverse MW:23828	8	yes	yes
NGO0048	carbamoyl phosphate synthase large subunit (CarB) 44218:47430 reverse MW:117487	8	yes	yes
NGO0714	putative phosphogluconate dehydratase 712859:714691 reverse MW:66240	8	yes	yes
NGO1700	putative signal recognition particle protein (Ffh) 1656453:1657820 forward MW:49501	8	yes	yes
NGO0906	conserved hypothetical protein 885930:887381 forward MW:53922	8	yes	yes
NGO1908	twitching motility/pilus retraction protein (PilT) 1881200:1882240 forward MW:37999	7	yes	yes
NGO0928	putative 5-methyltetrahydropteroyltriglutamate--homocysteine methyltransferase 907093:909366 reverse MW:85013	7	yes	yes
NGO0777	putative DNA-binding protein Hu (DbhA) 772204:772470 forward MW:9344	7	yes	yes
NGO1667	putative 2,3,4,5-tetrahydropyridine-2-carboxylate N-succinyltransferase (DapD) 1621298:1622116 reverse MW:29305	7	yes	yes
NGO1837	putative 50S ribosomal protein L4 (RplD) 1805314:1805931 reverse MW:23303	7	yes	yes
NGO1818	putative DNA-directed RNA polymerase alpha chain (RpoA) 1793557:1794540 reverse MW:36001	7	yes	yes
NGO2126	putative 50S ribosomal protein L31 (RpmE) 2108960:2109172 forward MW:8165	7	yes	yes
NGO2147	putative ATP synthase delta chain (AtpH) 2123492:2124022 forward MW:19497	7	yes	yes
NGO1841	30S ribosomal protein S10 (RpsJ) 1807364:1807672 reverse MW:11806	7	yes	yes
NGO1665	putative branched-chain amino acid aminotranferase 1619112:1620107 forward MW:36129	7	yes	yes
NGO1082	putative isocitrate dehydrogenase 1040337:1042559 forward MW:79949	7	yes	yes
NGO0177	putative two-component system transcriptional response regulator 180061:180735 reverse MW:24779	7	yes	yes
NGO0256	putative transcription termination factor (NusB) 254450:254872 reverse MW:15997	7	yes	yes
NGO0108	conserved hypothetical protein 121405:121887 forward MW:17861	7	yes	yes
NGO0220	putative UTP--glucose-1-phosphate uridylyltransferase 223916:224782 reverse MW:31997	7	yes	yes
NGO1821	putative 30S ribosomal protein S13 (RpsM) 1795624:1795983 reverse MW:13359	7	yes	yes
NGO1824.1	putative 50S ribosomal protein L18 (RplR) 1798882:1799232 reverse MW:12797	7	yes	yes
NGO1835	putative 50S ribosomal protein L2 (RplB) 1804164:1804994 reverse MW:30117	7	yes	yes
NGO2022	conserved hypothetical protein 1994166:1994492 forward MW:12717	7	yes	yes
NGO1779	ferric uptake regulation protein (Fur) 1748921:1749352 reverse MW:16410	7	yes	yes
NGO0223	putative pyrophosphatase 225746:226276 reverse MW:19767	7	yes	yes
NGO1926	putative glutamyl-tRNA synthetase (GltX) 1902644:1904035 forward MW:52329	7	yes	yes
NGO0615	putative ribonucleoside diphosphate reductase I beta chain 602880:604031 forward MW:44054	7	yes	yes
NGO1381	putative glutaredoxin 2 (Glr2) 1345407:1346045 reverse MW:23767	7	yes	yes
NGO0614	putative ribonucleotide reductase I alpha chain 600309:602585 forward MW:85169	7	yes	yes
NGO1573	putative ABC transporter, ATP-binding protein 1547579:1549252 forward MW:62035	7	yes	yes
NGO1863	putative DNA topoisomerase I (TopA) 1832032:1834335 reverse MW:87048	7	yes	yes
NGO0094	pilus secretion protein (PilQ) 103401:105569 reverse MW:77951	6	yes	yes
NGO0584	50S ribosomal protein L9 570285:570734 forward MW:15703	6	yes	yes
NGO0799	putative inosine-5'-monophosphate dehydrogenase 789053:790513 forward MW:52440	6	yes	yes
NGO0912	putative succinyl-CoA synthetase alpha subunit 890632:891519 reverse MW:30549	6	yes	yes
NGO1249	conserved hypothetical protein 1200307:1200639 reverse MW:11485	6	yes	yes
NGO0171	putative 50S ribosomal protein L19 174157:174519 reverse MW:13768	6	yes	yes
NGO0185	putative phosphoribosyl-ATP cyclohydrolase (HisB) 185866:186186 reverse MW:11925	6	yes	yes
NGO1422	putative heat shock protein 1384787:1385362 reverse MW:21350	6	yes	yes
NGO1442	putative alcohol dehydrogenase (AdhA) 1407236:1408279 forward MW:36608	6	yes	yes
NGO0687	putative ferredoxin-NADP reductase 677673:678446 reverse MW:29331	6	yes	yes
NGO1823	putative 50S ribosomal protein L15 (RplO) 1797731:1798162 reverse MW:14954	6	yes	yes
NGO1856	putative transcription antitermination protein (NusG) 1826199:1826732 reverse MW:20550	6	yes	yes
NGO0639	putative L-lactate dehydrogenase 625988:627157 forward MW:43397	6	yes	yes
NGO0333	putative phosphoribosylaminoimidazole-succinocarboxamide synthase (Pur7) 328606:329562 forward MW:35967	6	yes	yes
NGO1628	hypothetical protein, putative phage associated protein 1591878:1592057 reverse MW:6669	6	yes	yes
NGO1871	putative polypeptide deformylase (Pdf) 1842488:1842988 reverse MW:19071	6	yes	yes
NGO1551	hypothetical protein 1524875:1525528 reverse MW:24404	6	yes	yes
NGO1831	putative 50S ribosomal subunit protein L29 (RpmC) 1802249:1802437 reverse MW:7078	6	yes	yes
NGO1217	putative glutathione synthetase (GshB) 1166821:1167777 reverse MW:35288	6	yes	yes
NGO1673	type IV pilus assembly protein (PilF) 1627564:1629237 reverse MW:61892	6	yes	yes
NGO0956	putative aspartate kinase 929928:931142 reverse MW:43398	6	yes	yes
NGO2141	putative chromosome segregation protein 2119911:2120768 forward MW:31532	6	yes	yes
NGO0263	putative amidophosphoribosyltransferase (PurF) 261868:263409 reverse MW:55990	6	yes	yes
NGO0379	putative peptidyl-tRNA hydrolase (Pth) 373161:373736 reverse MW:21445	6	yes	yes
NGO1980	putative malate:quinone oxidoreductase (Mqo) 1955235:1956698 forward MW:54158	6	yes	yes
NGO2177	conserved hypothetical protein 2150386:2151108 forward MW:26470	6	yes	yes
NGO0963	putative arginyl-tRNA synthetase 936052:937767 forward MW:62620	6	yes	yes
NGO0741	putative RecA protein 737181:738224 forward MW:37643	6	yes	yes
NGO0809	putative dihydroxy-acid dehydratase 802732:804588 forward MW:66843	6	yes	yes
NGO0029	putative orotate phosphoribosyltransferase (PyrE) 26312:26950 reverse MW:23268	6	yes	yes
NGO0671	putative extragenic suppressor protein (SuhB) 661212:661994 forward MW:28573	6	yes	yes
NGO0701	hypothetical protein 695179:696018 forward MW:32738	6	yes	yes
NGO1993	putative cysteinyl-tRNA synthetase (CysS) 1965978:1967396 forward MW:52804	6	yes	yes
NGO1314	putative protease 1270189:1271541 forward MW:50809	6	yes	yes
NGO0918	putative citrate synthase 899186:900466 reverse MW:48121	6	yes	yes
NGO0158	putative aminopeptidase N 164163:166763 forward MW:97517	6	yes	yes
NGO0407	putative type I site-specific deoxyribonuclease 400706:403801 forward MW:118500	6	yes	yes
NGO2163	putative 3-oxoacyl-[acyl-carrier protein] reductase (FabG) 2139004:2139747 reverse MW:26035	5	yes	yes
NGO1577	outer membrane protein PIII (Omp3) 1551527:1552234 reverse MW:25540	5	yes	yes
NGO1233	putative ketol-acid reductoisomerase (IlvC) 1184233:1185243 reverse MW:36417	5	yes	yes
NGO0174	putative ribosomal protein S16 175811:176053 reverse MW:9319	5	yes	yes
NGO1767	putative catalase (KatA) 1730759:1732270 forward MW:57313	5	yes	yes
NGO0794	bacterioferritin (BfrA) 784686:785147 forward MW:17977	5	yes	yes
NGO1677	putative 50S ribosomal protein L27 (RpmA) 1631556:1631825 forward MW:9699	5	yes	yes
NGO0305	integration host factor alpha subunit (IfhA) 305660:305959 forward MW:11392	5	yes	yes
NGO1936	putative electron transfer flavoprotein alpha-subunit (EtfA) 1913175:1914107 forward MW:32592	5	yes	yes
NGO1232	ornithine carbamoyltransferase (OtcC) 1183116:1184108 forward MW:36645	5	yes	yes
NGO0866	putative serine hydroxymethyltransferase (GlyA) 848837:850084 forward MW:44990	5	no	yes
NGO1182	putative nitrogen regulatory protein P-II (GlnB) 1123805:1124140 reverse MW:12297	5	no	yes
NGO1823.1	putative 50S ribosomal protein L30 (RpmD) 1798167:1798349 reverse MW:6936	5	yes	yes
NGO1284	conserved hypothetical protein 1236501:1236947 forward MW:16460	5	yes	yes
NGO1610	putative transaldolase 1579424:1580476 forward MW:37502	5	yes	yes
NGO0583	putative 30S ribosomal protein S18 570038:570265 forward MW:8992	5	yes	yes
NGO1227	putative aminopeptidase A (AmpA) 1176315:1177718 reverse MW:49996	5	yes	yes
NGO1666	putative enoyl-ACP reductase (FabI) 1620358:1621140 reverse MW:27690	5	yes	yes
NGO1876	putative aspartate carbamoyltransferase regulatory subunit (PyrI) 1845759:1846214 reverse MW:16915	5	yes	yes
NGO0936	putative elongation factor P 914253:914810 reverse MW:20880	5	yes	yes
NGO0660	putative Glu-tRNAGln amidotransferase subunit 650780:652207 reverse MW:51713	5	yes	yes
NGO2044	putative methionyl-tRNA synthetase (MetG) 2017445:2019496 reverse MW:76944	5	yes	yes
NGO0058	putative MarR-family transcriptional regulator 59488:59862 forward MW:14354	5	yes	yes
NGO1675	putative octaprenyl-diphosphate synthase (IspB) 1630028:1630999 reverse MW:35414	5	no	yes
NGO1845	putative 30S ribosomal protein S12 (RpsL) 1811677:1812045 reverse MW:13736	5	yes	yes
NGO0848	putative 2-isopropylmalate synthase 831659:833209 reverse MW:55336	5	yes	yes
NGO1291	conserved hypothetical protein 1246816:1247541 forward MW:26074	5	yes	yes
NGO0645	putative ATP-dependent Clp protease ATP-binding subunit 634627:635868 forward MW:44832	5	yes	yes
NGO1909	putative twitching motility - like protein (PilU) 1882407:1883630 forward MW:45699	5	yes	yes
NGO0002	putative DNA polymerase III, beta subunit (DnaN) 1795:2895 forward MW:40869	5	yes	yes
NGO0403	ADP-L-glycero-D-mannoheptose epimerase 395496:396497 forward MW:38373	5	yes	yes
NGO0321	putative ubiquinone/menaquinone biosynthesis methyltransferase (UbiE) 320308:321042 forward MW:27400	5	yes	yes
NGO1456	putative aminopeptidase 1423095:1424888 forward MW:64934	5	yes	yes
NGO0717	putative glucokinase 717484:718467 forward MW:35112	5	yes	yes
NGO2166	putative malonyl CoA-acyl carrier protein transacylase (FabD) 2143484:2144407 reverse MW:32030	5	yes	yes
NGO1406	putative aminomethyltransferase (glycine cleavage system T protein) 1371202:1372299 reverse MW:39637	5	yes	yes
NGO1045	putative tryptophanyl-tRNA synthetase 1004861:1005868 reverse MW:37579	5	yes	yes
NGO0236	conserved hypothetical protein 239209:240492 reverse MW:47003	5	yes	yes
NGO0144	conserved hypothetical protein 152043:152864 reverse MW:31062	5	yes	yes
NGO1150	conserved hypothetical protein 1090278:1091045 reverse MW:29249	5	yes	yes
NGO0044	acetyl-CoA carboxylase, biotin carboxylase (AccC) 40685:42043 reverse MW:49643	5	yes	yes
NGO0668	putative SUN-family protein 657954:659207 reverse MW:46467	5	yes	yes
NGO1041	putative exopolyphosphatase 1001853:1003358 forward MW:55828	5	yes	yes
NGO1877	putative aspartate carbamoyltransferase catalytic subunit (PyrB) 1846227:1847144 reverse MW:34196	5	yes	yes
NGO1029	putative fumarate hydratase class II (FumC) 992675:994060 forward MW:49282	5	no	yes
NGO0650	putative ATP-dependent RNA helicase 639282:640667 reverse MW:51139	5	yes	yes
NGO0217	ABC transporter, periplasmic binding protein, iron related (FbpA) 220736:221728 reverse MW:35840	5	no	yes
NGO0346	putative twitching motility-like protein 341523:342632 forward MW:41478	5	yes	yes
NGO0718	putative RpiR-family transcriptional regulator 718519:719364 forward MW:30381	5	yes	yes
NGO0842	conserved hypothetical protein 826474:827139 forward MW:25311	5	yes	yes
NGO2154	putative glycyl-tRNA synthetase beta subunit (GlyS) 2129536:2131596 forward MW:74452	5	yes	yes
NGO0362	putative uroporphyrinogen decarboxylase 353265:354326 forward MW:39017	5	yes	yes
NGO1241	putative histidinol-phosphate aminotransferase (HisC) 1192685:1193761 forward MW:39257	5	yes	yes
NGO0689	putative threonine synthase 679478:680884 reverse MW:51478	5	yes	yes
NGO1791	putative glucose inhibited division protein B (GidB) 1764134:1764754 reverse MW:22774	5	yes	yes
NGO0372	putative ABC transporter, periplasmic binding protein, amino acid 366355:367179 forward MW:28843	4	yes	yes
NGO1763	putative 3-oxoacyl-[acyl-carrier-protein] synthase II (FabF) 1724796:1726040 forward MW:43041	4	yes	yes
NGO1853	putative 50S ribosomal protein L10 (RplJ) 1824241:1824738 reverse MW:17604	4	yes	yes
NGO0674	putative 3-isopropylmalate dehydrogenase (leuB) 662987:664054 reverse MW:39041	4	yes	yes
NGO0925	putative dihydrolipoamide dehydrogenase 904425:905825 reverse MW:50832	4	yes	yes
NGO1820	putative 30S ribosomal protein S11 (RpsK) 1795209:1795601 reverse MW:13919	4	yes	yes
NGO1376	conserved hypothetical protein 1341454:1341918 forward MW:17692	4	yes	yes
NGO1833	putative 50S ribosomal subunit protein L22 (RplV) 1803542:1803868 reverse MW:11908	4	no	yes
NGO0353	putative uracil phosphoribosyltransferase 345543:346166 forward MW:22877	4	yes	yes
NGO1336	putative dehydrogenase, lactate 1295543:1296538 reverse MW:36634	4	yes	yes
NGO0184	putative histidine triad-family protein (HitA) 185469:185789 reverse MW:11611	4	yes	yes
NGO0633	putative NifU-like protein 622457:622840 reverse MW:13946	4	yes	yes
NGO2151	putative ATP synthase epsilon chain (AtpC) 2127929:2128348 forward MW:14987	4	yes	yes
NGO0191	putative 30S ribosomal protein S15 192979:193245 forward MW:10386	4	yes	yes
NGO1684	conserved hypothetical protein 1637096:1637566 forward MW:17998	4	yes	yes
NGO2023	conserved hypothetical protein 1994506:1994808 forward MW:10950	4	yes	yes
NGO0795	bacterioferritin B (BfrB) 785178:785648 forward MW:18015	4	no	yes
NGO0385	putative delta-aminolevulinic acid dehydratase (AlaD) 377927:378940 forward MW:37250	4	yes	yes
NGO0053	carbamoylphosphate synthase small subunit (CarA) 50527:51657 reverse MW:40622	4	yes	yes
NGO1969	conserved hypothetical protein 1947212:1947418 reverse MW:8020	4	yes	yes
NGO0212	putative phosphoribosylformimino-5-aminoimidazole carboxamide ribonucleotide isomerase 214847:215581 reverse MW:25865	4	yes	yes
NGO1507	putative acyl-carrier protein synthase 1475064:1475438 reverse MW:13508	4	yes	yes
NGO1544	conserved hypothetical protein 1517520:1518473 reverse MW:34797	4	yes	yes
NGO0272	putative dimethyladenosine transferase 269252:270028 reverse MW:29236	4	yes	yes
NGO0066	putative tyrosyl-tRNA synthase (TyrRS) 66922:68214 forward MW:47182	4	yes	yes
NGO0092	putative 3-dehydroquinate synthase (AroB) 100462:101538 reverse MW:38581	4	yes	yes
NGO1922	filamentation temperature sensitive cell division protein (FtsE) 1900075:1900722 reverse MW:23843	4	yes	yes
NGO0221	conserved hypothetical protein 224813:225409 reverse MW:21317	4	yes	yes
NGO0298	putative 50S ribosomal protein L20 299759:300115 forward MW:13680	4	yes	yes
NGO1427	putative transcriptional regulator, repressor 1389204:1389911 reverse MW:26589	4	yes	yes
NGO0192	putative ABC transporter, ATP-binding protein, polyamine 193358:194647 forward MW:48461	4	yes	yes
NGO1806	putative acyl-(acyl-carrier protein)--UDP-N-acetylglucosamine O-acyltransferase (LpxA) 1779064:1779837 forward MW:28171	4	yes	yes
NGO0274	putative tryptophan synthase (TrpB) 271016:272215 forward MW:43459	4	yes	yes
NGO0146	putative porphobilinogen deaminase 153500:154432 forward MW:33613	4	yes	yes
NGO1693	conserved hypothetical protein 1645173:1645646 forward MW:18586	4	yes	yes
NGO0607	conserved hypothetical protein 593892:594581 reverse MW:26150	4	yes	yes
NGO1028	putative transketolase 990552:992528 forward MW:71575	4	yes	yes
NGO0920	putative succinate dehydrogenase 900833:901558 reverse MW:27944	4	yes	yes
NGO0402	putative sugar kinase / ADP-heptose synthase 394470:395429 forward MW:34673	4	yes	yes
NGO0089	putative diaminohydroxyphosphoribosylaminopyrimidine deaminase 97259:98365 reverse MW:40059	4	yes	yes
NGO1905	putative pyrroline-5-carboxylate reductase (ProC) 1879150:1879938 reverse MW:28162	4	yes	yes
NGO1997	putative aspartate-semialdehyde dehydrogenase (Asd) 1969316:1970428 reverse MW:39837	4	yes	yes
NGO1600	glutamine synthetase (GlnA) 1572078:1573493 reverse MW:52004	4	yes	yes
NGO1335	putative seryl-tRNA synthetase (SerS) 1294172:1295464 forward MW:47828	4	yes	yes
NGO0716	conserved hypothetical protein 716808:717500 forward MW:24878	4	yes	yes
NGO2060	putative signal recognition particle protein (FtsY/PilA) 2034825:2036087 forward MW:44759	4	yes	yes
NGO0862	putative fructose-bisphosphatase 844638:845609 forward MW:35474	4	yes	yes
NGO0299	putative phenylalanine tRNA synthetase, alpha-subunit 300293:301345 forward MW:39427	4	yes	yes
NGO0317	conserved hypothetical protein 314954:315553 forward MW:22476	4	yes	yes
NGO0870	putative ABC-type transporter, ATP-binding protein (AbcZ) 853094:855001 forward MW:71732	4	yes	yes
NGO1812	major outer membrane protein porin P.IB (por) 1788700:1789743 forward MW:37187	4	yes	yes
NGO0662	putative Glu-tRNA(Gln) amidotransferase subunit 653182:654624 reverse MW:51306	4	yes	yes
NGO1212	putative CTP synthase (PyrG) 1160959:1162590 reverse MW:59842	4	yes	yes
NGO1939	putative phosphoribosylamine--glycine ligase (PurD) 1915309:1916577 forward MW:45177	4	yes	yes
NGO0719	putative glucose-6-phosphate isomerase 719593:721236 forward MW:62117	4	yes	yes
NGO2081	conserved hypothetical protein 2060209:2060592 forward MW:14015	4	yes	yes
NGO0991	putative succinyl-diaminopimelate desuccinylase 962112:963254 reverse MW:41469	4	yes	yes
NGO0977	putative acetate kinase 946788:948011 forward MW:43597	4	yes	no
NGO1656	conserved hypothetical protein 1612053:1612916 reverse MW:31528	3	yes	yes
NGO2083	conserved hypothetical protein 2061192:2061455 forward MW:10179	3	yes	yes
NGO1961	putative argininosuccinate synthase (ArgG) 1937610:1938950 reverse MW:49689	3	yes	yes
NGO0348	putative type 4 pilus biogenesis protein 343650:343997 forward MW:12797	3	yes	yes
NGO1836	putative 50S ribosomal protein L23 (RplW) 1805003:1805320 reverse MW:11463	3	yes	yes
NGO2025	putative 30S ribosomal protein S9 (RpsI) 1995618:1996007 forward MW:14379	3	yes	yes
NGO1332	conserved hypothetical protein 1290931:1291353 forward MW:15499	3	yes	yes
NGO0899	putative transcription elongation factor (GreA) 878296:878769 reverse MW:17472	3	yes	yes
NGO1297	conserved hypothetical protein 1251402:1252754 reverse MW:46335	3	yes	yes
NGO0421	putative deoxycytidine deaminase 417115:417678 reverse MW:21281	3	no	yes
NGO1831.1	50S ribosomal protein L16 (RplP) 1802440:1802853 reverse MW:15519	3	yes	yes
NGO0742	conserved hypothetical protein 738883:739215 reverse MW:11982	3	yes	yes
NGO1238	putative ATP phosphoribosyltransferase (HisG) 1189709:1190371 forward MW:23776	3	yes	yes
NGO1711	putative adenylosuccinate lyase (PurB) 1668159:1669526 reverse MW:50337	3	yes	yes
NGO0257	putative riboflavin synthase beta chain 254953:255426 reverse MW:16968	3	yes	yes
NGO2035	putative hypoxanthine phosphoribosyltransferase (Hpt) 2005567:2006127 forward MW:20753	3	yes	yes
NGO1658	conserved hypothetical protein 1613246:1613533 reverse MW:10715	3	yes	yes
NGO1654	conserved hypothetical protein 1610660:1611148 reverse MW:17667	3	yes	yes
NGO1870	putative methionyl-tRNA formyltransferase (Fmt) 1841474:1842397 reverse MW:32827	3	yes	yes
NGO1821.1	putative translation initiation factor IF-1 (InfA) 1796186:1796401 reverse MW:8294	3	yes	yes
NGO0680	conserved hypothetical protein 669166:670332 forward MW:42792	3	yes	yes
NGO0387	conserved hypothetical protein 380367:381137 forward MW:28747	3	yes	yes
NGO0351	putative glutaredoxin-like protein (GrlA) 345126:345434 forward MW:11494	3	yes	yes
NGO1298	conserved hypothetical protein 1252772:1253041 reverse MW:10382	3	yes	yes
NGO0803	putative GTP-binding protein 793931:795739 reverse MW:67183	3	yes	yes
NGO0249	putative acetyl-CoA carboxylase transferase beta subunit 249737:250606 forward MW:31775	3	yes	yes
NGO0019	putative protein-L-isoaspartate O-methyltransferase (PimT) 16000:16653 forward MW:24082	3	yes	yes
NGO1983	putative methionine aminopeptidase (Map) 1957901:1958677 reverse MW:28216	3	yes	yes
NGO0410	putative cold shock protein (CspA) 406684:406884 forward MW:7195	3	yes	yes
NGO0644	putative ribosomal-binding factor A 634076:634444 reverse MW:14369	3	yes	yes
NGO0880	conserved hypothetical protein 862279:862881 forward MW:23074	3	yes	yes
NGO0244	conserved hypothetical protein 246914:247093 forward MW:7065	3	yes	yes
NGO1222	conserved hypothetical protein 1172774:1173121 reverse MW:12413	3	yes	yes
NGO1240	putative histidinol dehydrogenase (HisX) 1191350:1192636 forward MW:46381	3	yes	yes
NGO1285	putative N utilisation substance protein A (NusA) 1236963:1238477 forward MW:56443	3	yes	yes
NGO2020	putative phosphoenolpyruvate carboxylase (Ppc) 1990247:1992997 forward MW:103317	3	yes	yes
NGO1413	putative Na(+)-translocating NADH-ubiquinone reductase subunit A (NqrA) 1377046:1378386 forward MW:48742	3	yes	yes
NGO0388	putative oxidoreductase, NAD(P)H-flavin 381337:381999 forward MW:24823	3	yes	yes
NGO0199	transcription termination factor rho (Rho) 200275:201531 reverse MW:47320	3	yes	yes
NGO0867	conserved hypothetical protein 850163:850549 reverse MW:15056	3	yes	yes
NGO0478	hypothetical protein, putative phage associated protein 463489:463923 reverse MW:17008	3	yes	yes
NGO1999	putative methylenetetrahydrofolate dehydrogenase/cyclohydrolase (FolD) 1971249:1972100 reverse MW:30001	3	yes	yes
NGO1031	putative single-stranded DNA binding protein 995427:995948 reverse MW:19448	3	yes	yes
NGO0663	putative Glu-tRNA(Gln) amidotransferase subunit 654690:654977 reverse MW:11032	3	yes	yes
NGO0437	putative pantoate--beta-alanine ligase (PanC) 430569:431402 forward MW:31000	3	yes	yes
NGO0401	putative orotidine 5'-phosphate decarboxylase (DcoP) 393674:394411 forward MW:26505	3	yes	yes
NGO2052	alkylphosphonate uptake protein (PhnA) 2027715:2028041 reverse MW:11732	3	yes	yes
NGO1920	conserved hypothetical protein 1898820:1899065 reverse MW:8898	3	yes	yes
NGO0793	putative lipoic acid synthetase 783228:784208 forward MW:37047	3	yes	yes
NGO0669	conserved hypothetical protein 659246:660112 reverse MW:32819	3	no	yes
NGO0295	putative threonyl-tRNA synthetase 296950:298860 forward MW:72726	3	yes	yes
NGO1803	putative UDP-3-O-[3-hydroxymyristoyl] glucosamine N-acyltransferase (LpxD) 1776600:1777640 forward MW:36269	3	yes	yes
NGO0760	putative Holliday junction DNA helicase 755151:756179 reverse MW:37638	3	yes	yes
NGO0390	conserved hypothetical protein 382843:383730 reverse MW:32876	3	no	yes
NGO0986	putative small protein B homolog 957332:957781 reverse MW:17471	3	yes	yes
NGO0248	putative tryptophan synthase (TrpA) 248915:249697 forward MW:27992	3	yes	yes
NGO0844	putative acetylglutamate kinase 827592:828485 reverse MW:31417	3	yes	yes
NGO0832	putative oxidoreductase 820969:821685 forward MW:25979	3	yes	yes
NGO1342	putative dihydropteroate synthase (DHPS) 1302000:1302851 reverse MW:30380	3	yes	yes
NGO1529	putative cell division protein (FtsA) 1500174:1501415 reverse MW:44055	3	yes	yes
NGO0460	putative aminotransferases 452361:453545 forward MW:44135	3	yes	yes
NGO1134	putative GTP cyclohydrolase II 1079240:1079830 forward MW:21854	3	yes	yes
NGO1676	50S ribosomal protein L21 (RplU) 1631223:1631528 forward MW:11447	3	yes	yes
NGO0461	conserved hypothetical protein 453860:454636 forward MW:29630	3	no	yes
NGO0259	putative ribonuclease III (Rnc) 255967:256683 forward MW:26948	3	yes	yes
NGO0156	conserved hypothetical protein 163144:163935 forward MW:30500	3	yes	yes
NGO0890	putative D-lactate dehydrogenase 868321:870009 reverse MW:63390	3	yes	yes
NGO1561	putative exodeoxyribonuclease III 1534424:1535191 reverse MW:29182	3	yes	yes
NGO1329	putative amino acid aminotransferase 1287295:1288485 reverse MW:44506	3	yes	yes
NGO0845	conserved hypothetical protein 828655:829782 forward MW:41986	3	yes	yes
NGO0398	putative adenylosuccinate synthetase 389909:391210 forward MW:45982	3	yes	yes
NGO0006	putative leucyl-tRNA synthetase 6500:9133 forward MW:98282	3	yes	yes
NGO1695	putative phospho-2-dehydr-3-deoxyheptonate aldolase (AroG) 1646238:1647290 reverse MW:38655	3	yes	yes
NGO0526	putative phosphoribosylformylglycinamidine cyclo-ligase (PurM) 498786:499817 forward MW:36898	3	yes	yes
NGO0652	putative thioredoxin I 641997:642326 reverse MW:11830	3	yes	yes
NGO0332	putative reductase 327649:328509 reverse MW:31260	3	yes	yes
NGO0566	putative prolyl-tRNA synthetase (Syp) 549541:551250 forward MW:62868	3	yes	yes
NGO1761	putative dihydroorotate dehydrogenase (PyrD) 1723167:1724171 reverse MW:35822	3	yes	yes
NGO0548	conserved hypothetical protein 524253:525116 reverse MW:31153	3	yes	yes
NGO0543	conserved hypothetical protein 516349:517272 forward MW:33997	3	yes	yes
NGO0775	putative ATP-dependent protease (Lon) 769560:772019 forward MW:90784	3	yes	yes
NGO0349	conserved hypothetical protein 344005:344781 forward MW:28760	3	no	yes
NGO2074	putative 3-demethylubiquinone-9 3-methyltransferase (UbiG) 2053196:2053921 forward MW:26958	3	yes	yes
NGO0173	putative 16S rRNA processing protein (RimM) 175286:175792 reverse MW:18756	3	no	yes
NGO0209	putative peptide chain release factor 3 (RF-3) 211939:213531 reverse MW:59506	3	yes	yes
NGO1214	putative tRNA (5-methylaminomethyl-2-thiouridylate) methyltransferase 1164446:1165594 reverse MW:42795	3	yes	yes
NGO1745	putative NADH dehydrogenase I chain G (NuoG) 1704489:1706747 reverse MW:81392	3	yes	yes
NGO0815	putative UDP-N-acetylmuramate: L-alanyl-gamma-D-glutamyl-meso-diaminopimelate ligase 807104:808477 reverse MW:49447	3	yes	yes
NGO1783	putative ribosomal large subunit pseudouridine synthase C (RluC) 1752741:1753730 reverse MW:36662	3	yes	yes
NGO1748	putative NADH dehydrogenase I chain D (NuoD) 1709627:1710880 reverse MW:47562	3	yes	yes
NGO2103	putative DNA polymerase I (PolA) 2080441:2083230 forward MW:102136	3	yes	yes
NGO0608	putative murein transglycosylase / nitrite reductase transcriptional regulator 594652:596625 reverse MW:72089	3	yes	no
NGO1493	putative ribosomal protein S20 1456911:1457171 reverse MW:9508	3	yes	no
NGO1528	putative cell division protein (FtsZ) 1498877:1500052 reverse MW:41511	2	yes	yes
NGO0056	putative atpase (Mrp) 57125:58201 reverse MW:38138	2	no	yes
NGO0441	putative ribose-phosphate pyrophosphokinase 435484:436464 forward MW:35570	2	yes	yes
NGO0959	conserved hypothetical protein 932157:932618 reverse MW:16421	2	yes	yes
NGO0905	conserved hypothetical protein 885232:885930 forward MW:25794	2	yes	yes
NGO1781	putative dihydrodipicolinate reductase (DapB) 1749966:1750772 forward MW:28269	2	yes	yes
NGO0436	putative 3-methyl-2-oxobutanoate hydroxymethyltransferase (PanB) 429655:430443 forward MW:27724	2	no	yes
NGO1235	putative acetolactatesynthase isozyme III small subunit (IlvH) 1185686:1186174 reverse MW:18293	2	yes	yes
NGO0202	conserved hypothetical protein 205270:206088 forward MW:30883	2	yes	yes
NGO1426	conserved hypothetical protein 1388733:1389068 reverse MW:12290	2	no	yes
NGO2134	putative 30S ribosomal protein S21 (RpsU) 2113946:2114155 reverse MW:8355	2	yes	yes
NGO0063	putative GTP-binding protein 63621:64709 forward MW:39300	2	yes	yes
NGO0619	putative 2-dehydro-deoxyphosphooctonate aldolase 606723:607562 reverse MW:30516	2	yes	yes
NGO0262	putative transcription elongation (GreB) 261277:261765 reverse MW:18594	2	no	yes
NGO1208	restriction endonuclease R.NgoMIII (NgoMIIIM) 1157890:1158528 forward MW:24331	2	no	yes
NGO0678	conserved hypothetical protein 666979:667230 reverse MW:8783	2	yes	yes
NGO1013	putative phage repressor, putative phage associated protein 980161:980538 reverse MW:14071	2	no	yes
NGO0822	conserved hypothetical protein 813084:813482 forward MW:15465	2	no	yes
NGO1816	putative cell division inhibitor (MinC) 1792305:1793015 reverse MW:26268	2	yes	yes
NGO1680	putative 50S ribosomal protein L28 (RpmB) 1633626:1633856 reverse MW:8818	2	no	yes
NGO0999	putative RNA polymerase sigma factor 970867:972792 forward MW:73681	2	yes	yes
NGO0304	putative phenylalanyl-tRNA synthetase beta-subunit 303223:305583 forward MW:85989	2	no	yes
NGO0368	conserved hypothetical protein 360484:360861 reverse MW:13767	2	no	yes
NGO0823	conserved hypothetical protein 813556:813750 reverse MW:7632	2	yes	yes
NGO1678	putative monooxygenase (VisC) 1632063:1633244 forward MW:43603	2	yes	yes
NGO0239	putative thymidylate kinase 242398:243015 forward MW:22957	2	no	yes
NGO2175	conserved hypothetical protein 2149749:2150336 forward MW:21678	2	no	yes
NGO2171	putative fatty acid/phospholipid biosynthesis protein (PlsX) 2147053:2148096 reverse MW:36797	2	yes	yes
NGO2120	conserved hypothetical protein 2105766:2106041 forward MW:10137	2	no	yes
NGO1734	putative exodeoxyribonuclease VII small subunit (XseB) 1693791:1694012 forward MW:8363	2	no	yes
NGO1279	conserved hypothetical protein 1232386:1232940 reverse MW:20592	2	yes	yes
NGO0704	putative bifunctional 3,4-dihydroxy-2-butanone 4-phosphate synthase/GTP cyclohydrolase II 698003:699091 reverse MW:39229	2	yes	yes
NGO0245	putative 3-deoxy-manno-octulosonate cytidylyltransferase (KdsB) 247093:247851 forward MW:27723	2	yes	yes
NGO0037	conserved hypothetical protein 34415:35740 reverse MW:49652	2	yes	yes
NGO1520	conserved hypothetical protein 1487126:1487827 reverse MW:25845	2	yes	yes
NGO0211	putative imidazoleglycerol phosphate synthase (HisF) 214067:214831 reverse MW:27058	2	no	yes
NGO1565	putative nicotinate-nucleotide pyrophosphorylase (NadC) 1536270:1537148 reverse MW:31190	2	yes	yes
NGO0947	putative dihydrodipicolinate synthase 921442:922314 forward MW:30751	2	yes	yes
NGO2029	putative ubiquinol--cytochrome c reductase iron-sulfur subunit (PetA) 1999008:1999586 forward MW:20648	2	yes	yes
NGO2149	putative ATP synthase gamma chain (AtpG) 2125608:2126480 forward MW:32453	2	yes	yes
NGO0459	putative deoxyuridine 5'-triphosphate nucleotidohydrolase (Dut) 451837:452286 forward MW:16103	2	yes	yes
NGO0593	putative endopeptidase 580178:580789 forward MW:22606	2	yes	yes
NGO1486	putative agmatine ureohydrolase (SpeB) 1449381:1450301 reverse MW:33965	2	no	yes
NGO0434	conserved hypothetical protein 427788:428426 reverse MW:22755	2	no	yes
NGO0829	putative chaperone protein 816596:818455 reverse MW:66422	2	yes	yes
NGO2037	putative sugar transport PTS system phosphocarrier protein HPr (PtsH) 2006872:2007138 forward MW:9622	2	yes	yes
NGO0479	putative lambda repressor protein cI, putative phage associated protein 464039:464752 reverse MW:26498	2	yes	yes
NGO1204	putative anthranilate synthase component II (TrpG) 1150424:1151011 reverse MW:21862	2	yes	yes
NGO0271	hypothetical protein 268668:269234 reverse MW:22460	2	no	yes
NGO0042	putative oligo ribonuclease 39113:39673 reverse MW:21742	2	yes	yes
NGO0203	putative phosphatase 206180:206887 reverse MW:26085	2	yes	yes
NGO0213	putative imidazole-glycerol phosphate synthase amidotransferase component (HisH) 215617:216252 reverse MW:23570	2	no	yes
NGO1508	putative pyridoxal phosphate biosynthetic protein (PdxJ) 1475491:1476216 reverse MW:26565	2	no	yes
NGO2104	conserved hypothetical protein 2083795:2084487 forward MW:25894	2	yes	yes
NGO1730	putative Holliday junction DNA helicase (RuvA) 1690146:1690727 forward MW:20730	2	yes	yes
NGO1951	putative peptide chain release factor 2 (PrfB) 1923257:1924357 forward MW:41362	2	yes	yes
NGO0646	putative acetylornithine aminotransferase 635981:637171 reverse MW:42684	2	yes	yes
NGO0017	putative triosephosphate isomerase 14441:15211 reverse MW:28293	2	yes	yes
NGO0949	proline iminopeptidase 923582:924511 reverse MW:34791	2	yes	yes
NGO0106	putative S-adenosyl methionine synthetase (MetK) 118490:119683 forward MW:42995	2	yes	yes
NGO0371	conserved hypothetical protein 365165:366070 reverse MW:32829	2	yes	yes
NGO1802	conserved hypothetical protein 1776010:1776564 forward MW:21253	2	yes	yes
NGO1047	putative aminotransferase 1008782:1009993 reverse MW:45426	2	yes	yes
NGO0875	putative phosphoribosylaminoimidazole carboxylase (PurK) 858879:860012 forward MW:41076	2	no	yes
NGO0755	putative riboflavin synthase alpha subunit 752091:752750 forward MW:24269	2	yes	yes
NGO0101	putative cytochrome precursor 112020:112640 forward MW:22017	2	no	yes
NGO1236	putative acetolactate synthase isozyme III large subunit (IlvI) 1186188:1187912 reverse MW:62856	2	yes	yes
NGO0770	putative lipoprotein releasing factor (ABC-transporter, ATP-binding protein) (LolD) 764524:765216 forward MW:25259	2	yes	yes
NGO0269	putative ABC transporter, ATP-binding protein, amino acid 267332:268057 reverse MW:27027	2	yes	yes
NGO2146	putative ATP synthase B chain (AtpF) 2123017:2123484 forward MW:17106	2	yes	yes
NGO0426	putative histidyl-tRNA synthetase 421385:422677 reverse MW:48342	2	yes	yes
NGO0040	putative glutamate-1-semialdehyde aminotransferase (Gsa) 36524:37801 forward MW:45010	2	yes	yes
NGO0679	putative 3-isopropylmalate dehydratase large subunit 667328:668734 reverse MW:50474	2	yes	yes
NGO1454	putative lysyl-tRNA synthetase (LysRS) 1419720:1421228 reverse MW:57380	2	yes	yes
NGO1487	putative arginine decarboxylase (SpeA) 1450403:1452292 reverse MW:71053	2	yes	yes
NGO0255	putative dihydroorotase (PyrC) 253334:254365 forward MW:37068	2	yes	yes
NGO1160	putative phosphomethylpyrimidine kinase (ThiD) 1100404:1101207 forward MW:28353	2	yes	yes
NGO1914	putative 6-phosphogluconate dehydrogenase, decarboxylating (Gnd) 1891594:1893039 forward MW:52711	2	yes	yes
NGO1588	conserved hypothetical protein 1562943:1563356 forward MW:15811	2	yes	yes
NGO0578	putative excinuclease ABC subunit C 564000:565883 reverse MW:70938	2	yes	yes
NGO1567	putative quinolinate synthetase (NadA) 1538364:1539473 forward MW:40055	2	yes	yes
NGO1716	conserved hypothetical protein 1676324:1677325 forward MW:38854	2	yes	yes
NGO0001	putative chromosomal replication protein (DnaA) 159:1715 forward MW:58058	2	yes	yes
NGO2137	putative ABC transporter, ATP-binding protein 2116671:2117405 forward MW:26934	2	yes	yes
NGO0316	conserved hypothetical protein 313912:314850 forward MW:35302	2	yes	yes
NGO1772	putative DNA gyrase subunit B (GyrB) 1738583:1740970 forward MW:88210	2	yes	yes
NGO0697	putative type I restriction enzyme 690057:693080 forward MW:116207	2	no	yes
NGO1504	conserved hypothetical protein 1472567:1473706 reverse MW:42294	2	yes	yes
NGO2082	conserved hypothetical protein 2060648:2061115 forward MW:17492	2	yes	yes
NGO0417	conserved hypothetical protein 414026:414976 reverse MW:35343	2	yes	yes
NGO0309	putative dethiobiotin synthetase (BioD) 308847:309491 forward MW:23676	2	no	yes
NGO0083	pilin glycosylation protein (PglD) 88904:90811 reverse MW:70705	2	no	yes
NGO1713	conserved hypothetical protein 1670359:1672263 forward MW:70348	2	yes	yes
NGO0033	conserved hypothetical protein 28999:29853 reverse MW:30552	2	yes	yes
NGO0384	conserved hypothetical protein 377474:377755 forward MW:10530	2	yes	yes
NGO0684	putative GTP binding protein 673440:674546 forward MW:40265	2	yes	yes
NGO0210	putative phosphoribosyl-AMP cyclohydrolase 213641:214033 reverse MW:14817	2	yes	yes
NGO0702	hypothetical protein 696088:697686 forward MW:60024	2	yes	no
NGO1866	putative two-component system transcriptional response regulator 1836181:1837455 reverse MW:46519	2	yes	no
NGO0847	conserved hypothetical protein 830798:831457 reverse MW:24723	2	yes	no
NGO0781	putative ABC transporter, ATP-binding protein 775027:776946 forward MW:71831	2	yes	no
NGO0745	conserved hypothetical protein 743634:743816 forward MW:7394	2	yes	no
NGO0573	excinuclease ABC subunit B (UvrB) 557594:559618 forward MW:76909	2	yes	no
NGO0931	putative 50S ribosomal protein L36 910854:910976 forward MW:4958	2	yes	no
NGO1494	putative ABC transporter, periplasmic binding protein, polyamine 1457475:1458614 forward MW:41257	1	no	yes
NGO0574	carbonic anhydrase (Cah) 559802:560557 reverse MW:28085	1	no	yes
NGO1973	putative uridylate kinase (PyrH) 1950491:1951207 reverse MW:25714	1	yes	yes
NGO1814	putative cell division topological specificity factor (MinE) 1791194:1791454 reverse MW:10040	1	yes	yes
NGO0996	putative preprotein translocase SecA subunit 966013:968761 forward MW:103204	1	no	yes
NGO1881	putative pyruvate kinase (PykA) 1851530:1852999 forward MW:52508	1	yes	yes
NGO0045	putative biotin carboxyl carrier protein (BccP) 42160:42618 reverse MW:15795	1	no	yes
NGO0374	putative ABC transporter, ATP-binding protein, amino acid 367898:368650 forward MW:27996	1	no	yes
NGO0313	putative two-component system transcriptional response regulator 311581:312027 forward MW:16063	1	yes	yes
NGO1121; NGO0474	hypothetical protein, putative phage associated protein 1072918:1073391 forward MW:17220; hypothetical protein, putative phage associated protein 461694:462167 reverse MW:17220	1	no	yes
NGO1404	putative glycine cleavage system component H 1370078:1370461 reverse MW:13613	1	no	yes
NGO2000	putative transferase 1972740:1973243 forward MW:17808	1	yes	yes
NGO1721	putative indole-3-glycerol phosphate synthetase (TrpC) 1681208:1681987 forward MW:28622	1	yes	yes
NGO2131	putative regulator of pilE expression (RegG) 2112774:2113163 forward MW:14697	1	no	yes
NGO0825	putative ferredoxin 814566:814904 reverse MW:12400	1	no	yes
NGO0226	conserved hypothetical protein 229300:229719 forward MW:16551	1	yes	yes
NGO0031	putative acetyltransferase 27746:28183 reverse MW:16069	1	yes	yes
NGO0456	putative type IV pilin-like protein 450097:450582 forward MW:18083	1	no	yes
NGO1817	putative 50S ribosomal protein L17 (RplQ) 1793165:1793530 reverse MW:13775	1	no	yes
NGO1334	putative invasion protein 1293485:1294090 reverse MW:24222	1	no	yes
NGO0973	putative DNA polymerase III, epsilon chain 943796:944527 reverse MW:27151	1	no	yes
NGO0930	putative additional 50S ribosomal protein 910579:910851 forward MW:10424	1	no	yes
NGO1242	putative imidazoleglycerol-phosphate dehydratase (HisB) 1193958:1194689 forward MW:26904	1	no	yes
NGO2028	conserved hypothetical protein 1998136:1998882 forward MW:27414	1	no	yes
NGO2172	conserved hypothetical protein 2148189:2148713 reverse MW:19952	1	no	yes
NGO0908	trafficking protein A (FitA) 887955:888188 reverse MW:8433	1	no	yes
NGO0630	putative chaperone protein HscB 621287:621637 reverse MW:13368	1	no	yes
NGO0345	putative nucleoside phosphorylase 340639:341337 reverse MW:24806	1	yes	yes
NGO0208	conserved hypothetical protein 211238:211765 forward MW:19044	1	no	yes
NGO1859	putative ferredoxin 1828813:1829061 reverse MW:9552	1	yes	yes
NGO1548	putative thiol-disulfide isomerase (DsbA) 1521749:1522390 reverse MW:24003	1	no	yes
NGO0131	putative 6-pyruvoyl-tetrahydropterin synthase 140790:141209 forward MW:15749	1	no	yes
NGO0603	integration host factor beta subunit (IhfB) 588996:589289 reverse MW:11113	1	no	yes
NGO2102	conserved hypothetical protein 2079790:2080293 forward MW:18623	1	yes	yes
NGO0393	putative TetR-family transcriptional regulator 385200:385847 reverse MW:24752	1	no	yes
NGO1274	conserved hypothetical protein 1224815:1225993 forward MW:42261	1	no	yes
NGO0632	conserved hypothetical protein 622050:622367 reverse MW:11638	1	no	yes
NGO1502	putative amidase 1470320:1471615 forward MW:47002	1	no	yes
NGO0658	putative pyridoxamine-5'-phosphate oxidase 648913:649542 forward MW:24177	1	no	yes
NGO1261	conserved hypothetical protein 1214673:1215422 forward MW:27316	1	no	yes
NGO1343	conserved hypothetical protein 1302994:1303884 reverse MW:31884	1	yes	yes
NGO0303	hypothetical protein 302383:303129 forward MW:28630	1	no	yes
NGO0093	putative shikimate kinase (AroK) 101621:102130 reverse MW:18980	1	no	yes
NGO1690	conserved hypothetical protein 1644379:1644621 reverse MW:9499	1	no	yes
NGO1052	putative phosphatase 1012963:1013670 forward MW:25654	1	no	yes
NGO1657	conserved hypothetical protein 1612968:1613243 reverse MW:10017	1	no	yes
NGO1500	putative glutamate racemase (MurI) 1468912:1469721 reverse MW:29515	1	no	yes
NGO2013	putative ABC transporter, ATP-binding protein, amino acid 1984328:1985056 forward MW:26784	1	no	yes
NGO1503	conserved hypothetical protein 1471646:1472515 forward MW:33172	1	no	yes
NGO0404	putative type I restriction-modification system methyltransferase protein 396575:398116 forward MW:57480	1	no	yes
NGO1475	conserved hypothetical protein 1439315:1439671 reverse MW:12493	1	no	yes
NGO2160	conserved hypothetical protein 2136613:2137335 reverse MW:26779	1	yes	yes
NGO1609	putative polysialic acid capsule expression protein (KpsF) 1578356:1579408 reverse MW:37337	1	no	yes
NGO0055	pilus-associated protein (PilC1) 52530:55670 reverse MW:115039	1	no	yes
NGO1873	conserved hypothetical protein 1843286:1844620 forward MW:49953	1	yes	yes
NGO1225	putative peptidyl-prolylisomerase 1174734:1175549 reverse MW:28922	1	no	yes
NGO0116	putative protein-export protein (SecB) 127825:128265 forward MW:16333	1	no	yes
NGO2021	putative glycerol-3-phosphate dehydrogenase (GpsA) 1993123:1994109 forward MW:35368	1	yes	yes
NGO1986	putative phosphoheptose isomerase (LpcA) 1960050:1960640 reverse MW:21093	1	yes	yes
NGO0206	putative ABC transporter, periplasmic binding protein, polyamine 208983:210116 forward MW:41182	1	no	yes
NGO1608	conserved hypothetical protein 1577754:1578314 reverse MW:20169	1	no	yes
NGO0572	putative carboxy-terminal processing protease 555789:557261 forward MW:52735	1	yes	yes
NGO1178; NGO0902; NGO0304	DNA-binding competence protein 1 (ComE1) 1115392:1115688 reverse MW:10266; DNA-binding competence protein 4 (ComE4) 1872229:1872519 reverse MW:10067; DNA-binding competence protein 2 (ComE2) 1257501:1257791 reverse MW:10067	1	no	yes
NGO0391	conserved hypothetical protein 383753:384316 reverse MW:20135	1	no	yes
NGO0397	conserved hypothetical protein 388659:389807 forward MW:41790	1	no	yes
NGO1746	putative NADH dehydrogenase I chain F (NuoF) 1707463:1708761 reverse MW:47417	1	no	yes
NGO1466	putative bifunctional purine biosynthesis protein 1429174:1430751 reverse MW:56688	1	yes	yes
NGO0571	conserved hypothetical protein 553866:555659 forward MW:65943	1	yes	yes
NGO1747	putative NADH dehydrogenase I chain E (NuoE) 1709154:1709624 reverse MW:17146	1	no	yes
NGO0874	type II DNA restriction endonuclease R.NGOI (DcrD) 858002:858859 forward MW:31793	1	no	yes
NGO1532	putative UDP-N-acetylmuramate--alanine ligase (MurC) 1503248:1504765 reverse MW:54839	1	yes	yes
NGO2101	conserved hypothetical protein 2079349:2079765 forward MW:15552	1	yes	yes
NGO1735	putative geranyltranstransferase (IspA) 1693999:1694892 forward MW:31702	1	yes	yes
NGO0972	conserved hypothetical protein 943110:943796 reverse MW:24467	1	no	yes
NGO1194	Arginine biosynthesis bifunctional protein (ArgJ) 1135979:1137196 forward MW:42851	1	no	yes
NGO0575	conserved hypothetical protein 561640:562353 reverse MW:26961	1	yes	yes
NGO0268	conserved hypothetical protein 266900:267271 reverse MW:14777	1	yes	yes
NGO1602	putative shikimate dehydrogenase 1573804:1574610 forward MW:28649	1	no	yes
NGO1510	putative chorismate mutase 1477052:1478176 reverse MW:40822	1	yes	yes
NGO1312	conserved hypothetical protein 1269079:1269885 reverse MW:29080	1	yes	yes
NGO1709	conserved hypothetical protein 1665458:1666069 forward MW:21928	1	no	yes
NGO0149	putative ATP-dependent RNA helicase 157765:159135 reverse MW:50873	1	yes	yes
NGO0597	putative nucleoside diphosphate kinase 584141:584440 reverse MW:10928	1	yes	yes
NGO1933	putative nicotinamidase (PncA) 1910549:1911181 forward MW:23439	1	yes	yes
NGO1206	putative phosphatidylserine decarboxylase (Psd) 1154093:1154869 reverse MW:28294	1	no	yes
NGO0043	putative ribosomal protein L11 methyltransferase 39694:40578 reverse MW:31878	1	yes	yes
NGO0444	putative threonine dehydratase 438550:440073 forward MW:55033	1	yes	yes
NGO1788	putative glucose inhibited division protein A (GidA) 1759972:1761855 forward MW:69625	1	yes	yes
NGO0696	conserved hypothetical protein 688648:689955 forward MW:48378	1	yes	yes
NGO0761	conserved hypothetical protein 756266:756571 reverse MW:11739	1	yes	yes
NGO1468	putative phosphoserine phosphatase (SerB) 1432202:1433032 reverse MW:30485	1	yes	yes
NGO2065	putative UDP-3-O-[3-hydroxymyristoyl] N-acetylglucosmine deacetylase (LpxC) 2039370:2040290 reverse MW:33921	1	no	yes
NGO1743	putative NADH dehydrogenase I chain I (NuoI) 1702850:1703326 reverse MW:18156	1	no	yes
NGO0386	putative lyase 379010:380164 reverse MW:42255	1	yes	yes
NGO0047	putative s-adenosyl methionine:tRNA ribosyltransferase-isomerase (QueA) 42974:44011 forward MW:38151	1	no	yes
NGO1183	phophoribosylformylglycinamidine synthase (PurL) 1124292:1128245 forward MW:143371	1	yes	yes
NGO2112	putative para-aminobenzoate synthase component I 2097274:2099160 reverse MW:69358	1	yes	yes
NGO1627	conserved hypothetical protein, putative phage associated protein 1591374:1591772 reverse MW:14634	1	no	yes
NGO0958	putative ribonuclease PH 931347:932072 reverse MW:25646	1	no	yes
NGO1992	putative NgoI restriction endonuclease 1964910:1965959 forward MW:40552	1	no	yes
NGO1345	conserved hypothetical protein 1306144:1307619 reverse MW:55308	1	yes	yes
NGO0318	putative DNA repair protein (RecN) 315740:317410 forward MW:61132	1	yes	yes
NGO1727	putative tRNA/rRNA methyltransferase (SpoU) 1688399:1688860 forward MW:16845	1	yes	yes
NGO1213	putative long-chain-fatty-acid--CoA-ligase (LcfA) 1162705:1164372 reverse MW:61430	1	yes	yes
NGO2045	putative glucosamine--fructose-6-phosphate aminotransferase (GlmS) 2019615:2021450 reverse MW:66488	1	no	yes
NGO1701	hypothetical protein 1658079:1658531 forward MW:15980	1	yes	yes
NGO2140	putative 3-octaprenyl-4-hydroxybenzoate carboxy-lyase (UbiX) 2119187:2119756 reverse MW:20626	1	no	yes
NGO2161	conserved hypothetical protein 2137439:2138230 forward MW:29403	1	yes	yes
NGO0541	putative low-molecular weight phosphotyrosine protein phosphatase 515353:515805 forward MW:17095	1	yes	yes
NGO1382	putative GTP pyrophosphokinase 1346188:1348398 forward MW:82398	1	no	yes
NGO0072	putative penicillin tolerance protein (LytB) 77089:78054 forward MW:35141	1	yes	yes
NGO1799	putative 1-deoxy-D-xylulose 5-phosphate reductoisomerase (Dxr) 1771007:1772188 forward MW:42023	1	yes	yes
NGO1308	putative guanosine-3',5'-bis(diphosphate)3'-pyrophosphohydrolase (SpoT) 1265176:1267329 reverse MW:80159	1	no	yes
NGO0278	putative ribosomal large subunit pseudouridine synthase D (RluD) 280552:281673 forward MW:41295	1	yes	yes
NGO1785	putative ribonuclease E (Rne) 1754223:1756979 forward MW:101667	1	yes	yes
NGO1197	hypothetical protein 1140198:1141814 forward MW:62959	1	yes	yes
NGO0744	putative DNA mismatch repair protein (MutL) 741517:743490 reverse MW:71602	1	yes	yes
NGO1907	conserved hypothetical protein 1880397:1881080 reverse MW:24984	1	no	yes
NGO0984	conserved hypothetical protein 953232:954596 forward MW:50270	1	no	yes
NGO0743	putative DNA polymerase III tau and gamma chains 739299:741419 reverse MW:76083	1	yes	yes
NGO0642	putative tRNA pseudouridine synthase B 632563:633480 reverse MW:33387	1	yes	yes
NGO2008	putative oxidoreductase 1978816:1979913 reverse MW:40516	1	yes	yes
NGO0740	putative 3-dehydroquinate dehydratase (AroD) 736220:736981 reverse MW:27279	1	yes	yes
NGO0084	pilin glycosylation protein (PglC) 90862:92034 reverse MW:43315	1	no	yes
NGO0132	conserved hypothetical protein 141478:142482 forward MW:36755	1	no	yes
NGO1944	putative ECF-family RNA polymerase sigma factor 1918758:1919342 reverse MW:22565	1	yes	yes
NGO2079	putative carbonic anhydrase 2058949:2059545 forward MW:22086	1	yes	yes
NGO0900	putative 5-enolpyruvoylshikimate-3-phosphate synthase 879160:880458 forward MW:46744	1	yes	yes
NGO1966	conserved hypothetical protein 1943057:1943410 reverse MW:13809	1	no	yes
NGO0020	conserved hypothetical protein 16737:17057 forward MW:11998	1	yes	yes
NGO1360	putative GntR-family transcriptional regulator 1319922:1320698 reverse MW:29501	1	yes	yes
NGO1550	conserved hypothetical protein 1523365:1524858 reverse MW:53299	1	yes	yes
NGO1594	hypothetical protein 1566516:1566785 forward MW:10538	1	yes	yes
NGO0237	putative anhydro-N-acetylmuramyl-tripeptide amidase (AmpD) 240689:241258 reverse MW:21337	1	no	yes
NGO0934	conserved hypothetical protein 912562:913140 forward MW:21844	1	yes	yes
NGO0215	ABC transporter, ATP-binding protein, iron related (FbpC) 218072:219127 reverse MW:37902	1	yes	yes
NGO0392	conserved hypothetical protein 384369:385142 reverse MW:28808	1	yes	yes
NGO1786	putative pyridoxal phosphate biosynthetic protein (PdxA) 1757215:1758204 reverse MW:34501	1	no	yes
NGO2056	putative ABC transporter, thiamine-binding periplasmic protein 2030576:2031574 forward MW:36324	1	yes	yes
NGO0962	putative nicotinic acid phosphoribosyltransferase 934701:935957 forward MW:48221	1	yes	yes
NGO1988	conserved hypothetical protein 1961039:1961911 forward MW:31259	1	no	yes
NGO1612	conserved hypothetical protein 1581897:1582940 reverse MW:39589	1	no	yes
NGO0516	putative plasmid stable inheritance protein (PemK), putative phage associated protein 490832:491176 reverse MW:12437	1	yes	yes
NGO1337	putative peptide chain release factor I 1296666:1297739 reverse MW:39780	1	yes	yes
NGO0284	conserved hypothetical protein 285662:286078 forward MW:15741	1	no	yes
NGO1093	hypothetical protein, putative phage associated protein 1055031:1056446 reverse MW:49015	1	yes	no
NGO0069	putative isoleucyl-tRNA synthetase 71315:74101 forward MW:104225	1	yes	no
NGO1325	putative glycine dehydrogenase (GcsP) 1281814:1284663 forward MW:104081	1	yes	no
NGO0382	putative ATP binding protein, cell division protein (FtsH) 374716:376680 reverse MW:72084	1	yes	no
NGO1283	putative phosphoserine aminotransferase (SerC) 1235049:1236152 reverse MW:41294	1	yes	no
NGO1407	putative AsnC-family transcriptional regulator 1372811:1373290 forward MW:18017	1	yes	no
NGO1149	putative O-succinylhomoserine sulfhydrolase (MetZ) 1088972:1090129 reverse MW:41574	1	yes	no
NGO1668	putative glucose-6-phosphate isomerase (Gpi) 1622329:1623969 reverse MW:60318	1	yes	no
NGO2098	putative diaminopimelate decarboxylase (LysA) 2077524:2078741 reverse MW:43649	1	yes	no
NGO1080	putative C-type cytochrome 1038227:1038682 forward MW:16092	1	yes	no
NGO1801	conserved hypothetical protein 1773623:1775998 forward MW:87943	1	yes	no
NGO0424	putative GTP-binding protein (EngA) 419148:420602 reverse MW:54028	1	yes	no
NGO1207	excinuclease ABC subunit A (UvrA) 1155023:1157869 forward MW:105478	1	yes	no
NGO1218	putative glutaminyl-tRNA synthetase (GlnRS) 1167869:1169587 reverse MW:65775	1	yes	no
NGO1079	putative oxidoreductase 1037290:1038108 reverse MW:30124	1	yes	no
NGO1535	putative UDP-N-acetylmuramoylalanine--D-glutamate ligase (MurD) 1507333:1508667 reverse MW:48035	1	yes	no
NGO0598	conserved hypothetical protein 584616:585764 reverse MW:43769	1	yes	no
NGO1470	putative NADP transhydrogenase, alpha subunit (PntA) 1433321:1434856 forward MW:53776	1	yes	no
NGO1813	putative LysR-family transcriptional regulator 1790270:1791187 reverse MW:34104	1	yes	no
NGO0323	putative 2-amino-4-hydroxy-6-hydroxymethyldihydropteridine pyrophosphokinase (HppK) 321875:322366 reverse MW:18216	1	yes	no
NGO1533	putative UDP-N-acetylglucosamine--N-acetylmuramyl-(pentapeptide) pyrophosphoryl-undecaprenol N-acetylglucosamine transferase (MurG) 1504812:1505876 reverse MW:38283	1	yes	no
NGO1539	putative UDP-MurNAc-pentapeptide synthetase (MurF) 1510766:1512121 reverse MW:47773	1	yes	no
NGO1895	conserved hypothetical protein 1861748:1864018 reverse MW:83270	1	yes	no
NGO1209	DNA cytosine methyltransferase M.NgoMIII (NgomIIIm) 1158535:1159665 forward MW:42983	1	yes	no
NGO1878	conserved hypothetical protein 1847380:1848219 forward MW:31610	1	yes	no
NGO2017	putative SlyX protein (SlyX) 1988737:1988958 forward MW:8678	1	yes	no
NGO0611	1-acyl-SN-glycerol-3-phosphate acyltransferase 598437:599201 forward MW:27758	1	yes	no
NGO0183	sec-independent protein translocase (TatA) 185219:185419 reverse MW:7404	1	yes	no
NGO1596	conserved hypothetical protein 1567858:1568256 forward MW:15969	1	yes	no
NGO0370	putative exodeoxyribonuclease 361486:365085 reverse MW:134270	1	yes	no
NGO2107	putative thiophene and furan oxidation protein (ThdF) 2089574:2090917 forward MW:47440	1	yes	no
NGO1357	putative thymidylate synthase B 1317131:1317922 reverse MW:30247	1	yes	no
NGO1605	putative ABC transporter, ATP-binding protein 1575860:1576591 reverse MW:27011	1	yes	no
NGO2156	lacto-N-neotetraose biosynthesis glycosyl tranferase (LgtB) 2132702:2133538 forward MW:31796	1	yes	no
NGO0981	putative peptidyl-prolyl cis-trans isomerase 951904:952383 reverse MW:17345	1	yes	no
NGO0699	hypothetical protein 693413:694612 forward MW:45584	1	yes	no
NGO0676	putative DNA modification methylase (N.MgoV) 664838:666106 reverse MW:47560	1	yes	no
NGO1904	putative dosage-dependent DnaK suppressor protein (DskA) 1878583:1878996 reverse MW:15963	1	yes	no
NGO1162	Ribonuclease H 1102250:1102684 forward MW:16196	1	yes	no
NGO1773	putative L-serine dehydratase (SdaA) 1741072:1742454 forward MW:49186	1	yes	no
NGO0036	putative 1-deoxyxylulose-5-phosphate synthase (Dxp) 32252:34162 forward MW:68812	1	yes	no
NGO2123	conserved hypothetical protein 2107361:2107741 forward MW:14291	1	yes	no
1Three sets of proteins had peptides that could be assigned to more than one protein. These isoforms are all listed in the table,
but are counted as one protein in all analyses.
