# Supplementary material for: Identification and characterization of AckA-dependent protein acetylation in Neisseria gonorrhoeae
Source: PLoS One. 2017 Jun 27;12(6):e0179621. doi: 10.1371/journal.pone.0179621 (PMC5487020; doi:10.1371/journal.pone.0179621)
Supplement: S11 Table — (Sheet A) List of proteins found in common between the AckA-dependent K-ac sites found in the current study with a previous study examining protein level changes between anaerobic/aerobic growth. A number of proteins were found in common between these studies. These proteins may represent proteins that are very responsive to changes in metabolism and growth conditions. (Sheet B) List of proteins found in common between the AckA-dependent K-ac sites found in the current study with two previous studies examining: (1)Protein level changes between biofilm/planktonic growth of N. gonorrhoeae and (2) RNA-seq data comparing gonococcal mRNA levels from bacteria grown anaerobically/aerobically. It was difficult to draw much correlation between these datasets and the current study. The proteins from the biofilm dataset that matched our proteins list had differences that were highly variable or lacked statistical significance. In addition, mRNA levels are known to traditionally correlate poorly with protein-level changes. (XLSX) [file pone.0179621.s011.xlsx]

## Sheet: Sheet A
S11 Table. List of proteins found in common between the AckA-dependent K-ac sites found in the current study with a previous study examining
protein level changes between anaerobic/aerobic growth. A number of proteins were found in common between these studies. These proteins
may represent proteins that are very responsive to changes in metabolism and growth conditions.
		AckA dependent K-ac sites	aZielke et al. protein
Protein name	Accession#	observed in the current study	level diff. anaerobic/aerobic
Putative fructose-bisphosphate aldolase	NGO0034	K333, K339	2.75 ± 1.65
Putative two-component system transcriptional response regulator	NGO0177	K187, K190	2.76 ± 0.4
Putative zinc-binding alcohol dehydrogenase	NGO0186	K207, K329	6.52 ± 2.71
Putative UTP--glucose-1-phosphate uridylyltransferase	NGO0220	K85	4.17 ± 2.63
Putative oxidoreductase, NAD(P)H-flavin	NGO0388	K116	3.4 ± 2.41
Putative dihydrolipoamide dehydrogenase	NGO0562	K345, K421, K461	3.07 ± 0.99
Pyruvate dehydrogenase E1 component	NGO0565	K68	5.99 ± 0.19
Putative 30S ribosomal protein S1	NGO0604	K151, K248	4.4 ± 0.65
Putative ABC-transporter, ATP-binding protein	NGO0764	K316	3.55 ± 1.45
Putative peroxiredoxin family protein/glutaredoxin	NGO0926	K10, K169, K179, K187, K34	2.7 ± 1.36
Enoyl-[acyl-carrier-protein] reductase [NADH]	NGO1666	K43	2.78 ± 1.32
Putative electron transfer flavoprotein beta-subunit	NGO1935	K67	4.59 ± 2.07
Putative regulator of pilE expression	NGO2130	K167, K170, K177	2.14 ± 0.34
aData were obtained from: Zielke RA, et al. (2016) Proteomics-driven Antigen Discovery for Development of Vaccines Against Gonorrhea.
Mol Cell Proteomics 15: 2338-2355.

## Sheet: Sheet B
S11 Table. List of proteins found in common between the AckA-dependent K-ac sites found in the current study with two previous studies examining: (1)Protein level
changes between biofilm/planktonic growth of N. gonorrhoeae and (2) RNA-seq data comparing gonococcal mRNA levels from bacteria grown anaerobically/aerobically.
It was difficult to draw much correlation between these datasets and the current study. The proteins from the biofilm dataset that matched our proteins list had differences
that were highly variable or lacked statistical significance. In addition, mRNA levels are known to traditionally correlate poorly with protein-level changes.
		AckA dependent K-ac sites	aPhillips et al. protein level	bIsabella et al. RNA-seq
Protein name	Accession#	observed in the current study	diff. biofilm/plank	anaerobic/aerobic rep1, rep2
Putative zinc-binding alcohol dehydrogenase	NGO0186	K207, K329	1.34 (1)	no
Putative dihydrolipoamide dehydrogenase	NGO0562	K345, K421, K461	variable (2.0, 0.6, 0.45)	no
Pyruvate dehydrogenase E1 component	NGO0565	K68	variable (1.4, 0.5, 0.4)	no
Putative 30S ribosomal protein S1	NGO0604	K151, K248	variable (1.3, 0.7, 0.5)	no
Putative ABC-transporter, ATP-binding protein	NGO0764	K316	0.59 (1 rep)	no
Putative peroxiredoxin family protein/glutaredoxin	NGO0926	K10, K169, K179, K187, K34	variable (0.8, 1.5, 0.6)	no
Enoyl-[acyl-carrier-protein] reductase [NADH]	NGO1666	K43	0.747 (1 rep)	no
Putative electron transfer flavoprotein beta-subunit	NGO1935	K67	0.56 (1 rep)	no
conserved hypothetical protein	NGO0108	K74	0.52 (1 rep)	-4, -5.9
putative ribosomal protein S16	NGO0174	K46, K73	variable (1.1, 0.33, 0.76)	no
putative threonyl-tRNA synthetase	NGO0295	K225	0.63 (1 rep)	no
conserved hypothetical protein	NGO0328	K108, K120	variable (0.6, 1.5)	no
putative peptidyl-prolyl cis-trans isomerase B	NGO0376	K113	0.69 (1 rep)	no
ADP-L-glycero-D-mannoheptose epimerase	NGO0403	K312	0.5 (1 rep)	no
50S ribosomal protein L9	NGO0584	K45	0.56, 0.78	no
putative khg/kdpg 4-hydroxy-2-oxoglutarate aldolase/2-deydro-3-deoxyphosphogluconate bifunctional aldolase (AlkH)	NGO0713	K145	0.74 (1 rep)	-3, -5.6
putative inosine-5'-monophosphate dehydrogenase	NGO0799	K189	variable (2.3, 0.6, 0.7)	no
putative succinyl-CoA synthetase beta subunit	NGO0913	K310	0.59 (1 rep)	no
putative dihydrolipoamide dehydrogenase E3 component (DldH)	NGO0915	K233, K307	variable (1.8, 0.5)	no
putative ketol-acid reductoisomerase (IlvC)	NGO1233	K336	1.26 (1 rep)	no
putative phosphoglycerate mutase (PgmA)	NGO1258	K97, K98, K103	0.83 (1 rep)	-4, -5.6
putative heat shock protein	NGO1422	K57, K83	0.22 (1 rep)	3.6, 2.7
outer membrane protein PIII (Omp3)	NGO1577	K103	3.1, 2.5, 1.8	no
putative 2,3,4,5-tetrahydropyridine-2-carboxylate N-succinyltransferase (DapD)	NGO1667	K85	0.77	no
putative ribosome recycling factor (Rrf)	NGO1796	K21, K141, K144, K146, K166	0.8	no
putative 50S ribosomal protein L5 (RplE)	NGO1827	K9, K145	variable (1.37, 0.8, 1.38)	no
30S ribosomal protein S10 (RpsJ)	NGO1841	K11	0.6, 0.7 0.9	-2.7, -7.1
translation elongation factor TU (TufA2)	NGO1858	K39, K45, K57, K306	variable (0.8, 1.7, 0.7)	no
putative 30S ribosomal protein S7 (RpsG)	NGO1844	K52	variable (2.3, 0.7, 1.0)	no
twitching motility/pilus retraction protein (PilT)	NGO1908	K117	variable (0.78, 1.44)	no
putative 30S ribosomal protein S2 (RpsB)	NGO1975	K131	variable (1.3, 0.68, 1.4)	no
putative chaperonin 10 Kd subunit (GroES)	NGO2094	K20, K64, K69	0.79 (1 rep)	no
chaperonin 60 Kd subunit (GroEL)	NGO2095	K117	variable (1.5, 0.35, 0.34)	no
putative ATP synthase beta chain (AtpD)	NGO2150	K104	variable (1.8, 0.34, 0.3)	no
conserved hypothetical protein	NGO1318	K75, K115, K118	no	-7.1, -12.5
hypothetical protein, putative phage associated protein	NGO1628	K17	no	7.6, 4.9
aDataset used from: Phillips NJ et al. 2012. Proteomic analysis of Neisseria gonorrhoeae biofilms shows shift to anaerobic respiration and changes in nutrient transport and
outermembrane proteins. PLoS One 7:e38303. All extracts from datasets are listed separately; if only found in one biological replicate one time that is noted in the table.
bDataset used from:Isabella VM, Clark VL. 2011. Deep sequencing-based analysis of the anaerobic stimulon in Neisseria gonorrhoeae. BMC Genomics 12:51. The two
replicates are listed separately, as they were in the paper.
